# Supplementary material for: Metamorphism of Arctic marine snow during the melt season.Impact on albedo
Source: Copernicus journal article supplement (doi:10.5194/tc-2019-113), 2019-07-24
Supplement: Supplementary file [file tc-2019-113-RC2-supplement.pdf]

Review of “Metamorphism of Arctic marine snow during the melt season. Impact on albedo” by Verin et al.

### **General comment**

In this paper, Verin et al. described and analysed the snow and spectral albedo observations carried out over landfast sea ice in the Baffin Bay during two melt seasons in 2015 and 2016. The main strength of the presented observational dataset is the collocated measurements of snow microstructure and snow spectral albedo, which make this a very rare and unique Arctic dataset. These measurements enabled the use of a radiative transfer model to test if the collected snow observations were suitable to reproduce the observed albedo. Compared to similar studies over continental snow, the conditions were complicated by the spatial heterogeneity of the snow layer, by the presence of melt ponds at the end of the snowmelt period, and by the wetness of the snow in the last phase of the melting. The results revealed the shortcomings of the applied snow measurement technique in those particular conditions, and suggestions to improve the measurement protocol were given. The applied radiative transfer method appeared robust.

Main weaknesses of the paper are:

- Introduction should be compacted, leaving out all those details and concepts that deviate from the main scope of the paper.
- The snow layer identification seems sometimes arbitrary. Due to the large spatial heterogeneity of the snowpack, it is hard to obtain the stratigraphic evolution of the snowpits, except in a broad line. The number of speculations on the evolution of the stratigraphy should be reduced to a minimum.
- It is not always clear to which campaign (year) the results and discussion refer to. This should be clarified, and possibly the differences in snowpack characteristics between the two years should be discussed more extensively (personally I find the large observed differences very interesting, especially from modelling perspective).
- Several linguistic errors were found. A thorough linguistic revision is therefore recommended.

I recommend the editor to publish the paper in The Cryosphere after a major revision. Here below are my detailed comments.

### **Detailed comments**

p.2, line 11-12: “Briefly, albedo increases when snow particles size decreases, and these changes are larger in the infrared than in the visible.” Please introduce here a brief explanation for this.

p.2, lines 15-16: “Domine et al. (2006) fairly easily in the field using infrared reflectance methods, for example with 15 1310nm radiation (Gallet et al., 2009).” Maybe you meant: “Domine et al. (2006) measured SSA fairly easily in the field using infrared reflectance methods, for example with 1310nm radiation (Gallet et al., 2009).”

p.2, line 16: “...snow SSA is now regularly measured on continental snowpacks”. Certainly this is not the case. Only very few groups in the world measure SSA, and even fewer (so few that the authors could list them here, as they can be counted with the fingers on one hand) measure it regularly, i.e. not only in dedicated field campaigns. As the authors demonstrate also with this paper, SSA measurements are extremely challenging and expensive (as all manual measurements are), and techniques are evolving all the time.

From p.2 line 19 to p.3 line 17: what is the point here? Please move part of the text into the discussion section, to compare the results of this paper with previous ones, and leave in the introduction only the key message (few lines only), avoiding all the details and concepts that deviate from the focus of the paper. The introduction should explain the relevance of the treated issue and the problems that previous works have left unsolved and this paper will help to solve. Is the message here that the snow processed studied in this work have been studied already a lot? What is then the added value of this work?

p.2, lines 29-30: "Overall snow thickness ranges from a few centimeters up to 70cm depending on the roughness of the underlying ice (Sturm et al., 2002) with an average density of  $375\text{kgm}^{-3}$ ". Where this value of average density comes from? Please provide a reference. Also, I would say that snow thickness primarily depends on the thickness of the underlying sea ice and on the amount of solid precipitation, and only secondarily on the sea ice roughness.

p.3, lines 7-8: "Snow reaches melting temperature as it undergoes wet metamorphism. Once at  $0^{\circ}\text{C}$ , remaining snow layers melt rapidly (Gallet et al., 2017)." Please reformulate or (better) remove.

p. 3, line 8: "snow grain size". The authors need to be consistent with the chosen terminology. In previous paragraphs, the evolution of snow microstructure is described in term of SSA. Please stick to it, or then change it to optical diameter in the whole introduction

p.3, line 18: "For the past 20 years, considerable effort has been made to better understand the radiative properties of snow on sea ice and their evolutions across seasons." Effort was made also before (see e.g. SHEBA experiment, Russian ice drift stations, etc...).

p.4, line 27: What do the author mean for "geometric size"?

p.5, lines 2-3: "The main uncertainties concern the real volume extracted by the cutter depends on the type of snow". Correct as "The main uncertainties concern the real volume extracted by the cutter, which depends on the type of snow".

p.5, line 5: Should 63 m be 63 mm

p.5, line 20-22: Please correct as shown: "Particular efforts were made to sample the widest *possible* range of snowpack depths ~~possible~~ in order to catch spatial variability. ~~Transects:~~ *For the same purpose*, albedo was also measured every 5 m along transects (from 100m to 150m long) ~~in order to catch the spatial variability~~".

p.6, line 7: "Thus, in most cases, it is reasonable to assume that the precision on albedo measurements is below 1%." Please replace "precision" with "uncertainty". I disagree with this estimation, as it only account for repeatability of the measurements, while many other error sources are in place (e.g. shadow/obstruction of the measurement setup, deviation from perfect cosine response, reflections/shadows from nearby dunes).

p. 7, line20: "several snowfalls". During the observing period in 2015, only two snowfall events were marked in Fig 4. In addition to these, where there other light snowfall events? If so, please mark all of them (see also my comments later)

In relation to Figure 4, I recommend to:

- Zoom the temperature plot between  $-30^{\circ}\text{C}$  and  $+10^{\circ}\text{C}$
- Specify (in the figure caption) the time interval of the temperature and snow depth observations

- Describe (in the main text) the accuracy of temperature and snow depth measurements. Temperature measurements may be biased if the sensors are not ventilated and heated, and snow depth representativeness should be discussed.

p.7, line 26: please do not refer to Fig 5, as it does not show any albedo data.

p.7, line 26-27: “Snowpack thickness decreased very quickly until melt-out (4 days in 2015, 7 days in 2016)”. This mentioned periods correspond to the lengths of phase III in the two years, but according to Fig 4 snow thickness reached 0 only some days after end of phase III. Please refer here to Fig 4.

p.8, line 13: Could the authors clarify what “sublimation crystal” are, without making necessary for the reader to read Gallet et al. 2014?

p.8, lines 14-15: “Figure 6 also shows a significant dichotomy in both profiles with layers I and II characterized by lower SSA and higher density than layer III.” Is it so that the snowpits that do not present such a dichotomy (4 of them) are from dunes? If this is the case, please explain it.

In relation to Fig 6, I recommend to mark the snowpits that correspond to the dunes.

p.8, line 18-19: “Furthermore, layer II could be divided into two distinct layers of indurated faceted crystals which showed highest densities values, up to 500kgm<sup>-3</sup>, topped by a wind slab.” Why the uppermost dune layer is called IIb instead of III? Isn't it generated by the same process at the same time?

Generally, it is very difficult to see correspondence between the layers described in fig 5 and the SSA and density profiles shown in Fig 6. The distinction between layer I and II is quite obscure in Fig 6 (do indurated depth hoar (layer I) and indurated faceted crystals (layer II) have same SSA and density?). Also the distinction between layer II and IV is hard to see in Fig 6. It seems to me that the schematic picture of the stratigraphy in fig 5 can be applied to few selected cases, but then most of the profiles are much more complex, also in view of the spatial heterogeneity. I therefore recommend referring to Fig 5 only as an example of the observed stratigraphy, valid for a subgroup of snowpits, and mark in fig 6 what are the snowpits with stratigraphy that follows fig 5. Alternatively, I recommend to mark the 4 layers (e.g. with horizontal black lines) in each snowpit shown in fig 6. Actually, I recommend marking the layers also in case that stratigraphy is shown only for a selection of snowpits.

p.8, lines 28-29: “Several snowfalls deposited a new fresh snow layer covering layer Va (Figure 5), which then quickly metamorphised”. Fresh snow layers are not visible from Fig.5. From fig 4 I can see 2 snowfall episodes during phase II in 2015 (28.5 and 4.6), which are associated to a rise in snow thickness, but from Fig 6 I can probably identify 3 cases of high SSA at the surface (compatible with fresh snow): 26.5, 28.5, and 30.5 (second snowpit). On 30.5 (first snowpit), 31.5 and on 4.6 the surface SSA is medium, but much larger than in the underlying layers, hinting to a fast metamorphism of the fresh snow. Was there light snowfall on 26.5 and 30.5? If not, what caused the rise in SSA? Could you please unambiguously identify all cases when there was light or heavy snowfall, to separate them from the cases of surface freezing and needle formation/deposition?

In conclusion, yes, I can see what the authors states, but it should be explained better, referring to fig 4 and 6, perhaps mentioning that light snowfalls on 26.5 and on 30.05 were not marked in fig 4 (if this is the case!)

p.9, lines 1-3: "Ice layers within the snowpack were first observed on May 29 and became more and more common, to the point that they were present everywhere at the end of phase II and several of them could be found in the same snow column." Could the authors show some example, pointing to specific profiles in Fig.6? E.g. on 7.6?

p.9, lines 7-8: "Liquid water did not go deeper than this interface ...." Did the authors measure the profile of liquid water content, or is this conclusion based on other considerations or assumptions? Please clarify.

p.9, line 9-10: replace "was regularly" with "became"? Replace "increasing" with "increased"? Replace "but also due to bottom ice melt which may not be excluded caused by influx of warmer ocean water" with "but also possibly due to bottom ice melt which occurs in case of influx of warmer ocean water"

p.9, line 13: remove "afterward".

Caption of Fig. 7: "... and D) melt pond formation, here albedo over bare ice only and melt pond only are also shown." Please break the sentence: "and D) melt pond formation. In D) albedo over bare ice only and melt pond only are also shown."

p.9, line 26: "... brought back albedo" should be "... brought albedo back"

p.9, line 26: "Despite the wider range of albedos presented in Figure 7" Wider than what? Certainly albedo range is not wider than in Fig 3, as data are the same. Maybe the authors refer to a wider albedo range in 7B compared to the range seen in 7A?

p.9, line 27: "spatial variability did not evolve during phase II" Do the author mean that spatial variability did not increase during phase II? Please correct.

p.9, line 30: Replace "(see Figure 7)" with "(see Figure 7C)"

p.10, line 2-4: Replace "(Figure 3 and 5)" with "(Figure 3 and 7D)" and replace "(see spectra in Figure 7b)" with "(Table 2)".

p.10, line 4: should "cooling event" be replaced by "snowfall"?

Can the authors provide more descriptions of the melt ponds? How deep they were, where they open or frozen, how large they were, and were they covering the totality (or more than 90%) of field of view of the downward looking head of the spectro-radiometer (having, thus, a radius of more than 3m)? How many melt ponds have been measured? Had they varying characteristics? Are the provided values for bare ice and melt pond albedo some averages? What was then the standard deviation? Also, in the discussion section it would be good to compare with the bare ice and pond albedo measurements carried out in previous studies.

p.10, lines 6-8: "Albedo simulations were performed in order to first assess the relevance of the snow properties dataset for radiative transfer modeling purpose and secondly to quantify the importance of the albedo dependence on the snow surface properties and on snow depth." This concept is badly expressed. Please consider rewriting "Albedo simulations were performed to assess the adequacy of the collected snow observations for radiative transfer modelling, and to quantify the sensitivity of surface albedo to snow surface properties and snow depth."

p.10, first paragraph: please specify which grain shape was applied in the TARTES simulations.

p.10, lines 17-18: are STD percentages? I suppose so... then please add the %.

p.10, lines 18-19: "Simulations with SSA reduced by 20% (see Figure 8 and Table 3), larger than the expected uncertainty, is not sufficient to offset the bias which is lowered to 1.0% at 500 nm." Based on the personal experience of some colleagues, who found strong overestimation of SSA using a similar measurement principle (IceCube), I think that in melting conditions the error in SSA measurements done with the applied sampling technique is closer to 100% than to 20%. The fact that the error increases with increasing wetness of the snow, and that it is most severe for the 1000nm than for the 500nm albedo, suggests that there is a problem in the SSA estimation. I recommend replacing the albedo modelled using  $\pm 20\%$  SSA with the albedo modelled using  $\pm 100\%$  SSA.

p.10, line 25: "Occasional errors": I guess you mean "occasional cases of larger errors"

p.10, lines 26-27: "These errors may be due to erroneous measurements of snow properties due to warmer temperature, much larger than 20% on SSA,...". Please rearrange the sentence as "Errors in SSA much larger than 20% may be due to erroneous measurements of snow properties caused by the melting conditions".

p.11, lines 2-4: "For snow conditions close to what was observed in phase II (frost or fresh snow with higher SSA  $> 20 \text{ m}^2\text{kg}^{-1}$  than underlying layers  $< 5 \text{ m}^2\text{kg}^{-1}$ ) then h is given to be at least 8 mm." Please improve the readability of this sentence, e.g. as "For snow conditions close to what was observed in phase II (frost or fresh snow at the surface with SSA  $> 20 \text{ m}^2\text{kg}^{-1}$  and underlying layers with SSA  $< 5 \text{ m}^2\text{kg}^{-1}$ ) h is at least 8 mm."

p.11, line4: Please remove "This means that", and put a comma after "in this case".

p.11, lines 7-8: "The agreement were better during phase I, which suggest that snow properties were more homogeneous vertically." In my view, the main reason for the better agreement between modelled and observed albedo is that SSA measurements are easier and, hence, more reliable in case of dry snow.

p.11, line10-11: "Albedo spectra of bar ice and melt pond (as shown in Figure 7d) were used as soil albedo in TARTES." There cannot be snow above an open melt pond. Did the measured albedo spectra correspond to frozen melt ponds or to open melt ponds? They have quite different albedo. Did the authors measured the albedo of slush? Is it equal to the applied albedo of melt pond? These model results may be used to interpret the evolution of albedo during phase III -IV in 2016, but not in 2015 (which is the year illustrated in Fig 6 and 8), where neither slush nor melt ponds were observed.

Caption of Figure 10: "Dots and square markers represent the data at respectively 500 nm and 1000 nm collected during phase III in 2016 along two albedo transects (June 13 and 15) where snow depths were also measured" I think that this 2016 measurements should be mentioned also in the text, when introducing Figure 10, adding some more info. Was the ice thickness measured? Figure 10 suggests that there were quite large spatial differences in the measured albedo spectra of bare ice and melt ponds/slush, isn't it? I think it is worth discussing it.

p.11, lines 11-12: "The objective is to illustrate the albedo decrease in the visible leading to spatial variability as observed in phase III." This is a very badly formulated sentence. Do the authors mean that "The objective is to illustrate how the increase in spatial variability of snow properties causes a decrease in the visible albedo as observed in phase III"?

p.11, line29: please remove the first word ("these").

p.12, line 17: please remove "to" after "layer III and Iva formed after"

p.12, from line 16 to 28: in my opinion this section includes too many speculations and it is very hard to read. After all, the large spatial heterogeneity prevents the possibility to generalize the stratigraphy of single snowpits. I recommend a strong reduction of the text here, leaving only the essential content related to dune formation and spatial heterogeneity. It would be nice to spend more words on the comparison between 2015 and 2016.

p.13, from line 22 onward: the mentioned dates (June 4 and later June 10, 6, 8, 15) all refer to 2015? If so, please specify (referring to Fig 8 for the first mentioned date is not clear enough). If the whole discussion in 4.2 refers to the measurements collected in 2015, when there was no slush, it has to be made clear. Again, were albedo responses to changes in snow properties different in 2015 and 2016 during phase II and III?

In relation to Fig 8, please correct the figure caption as "Albedo measurements (blackgray squares) and simulations modeling (grayblack dottes) at 7500 nm (A) and 1000 nm (B) for each sampling station in 2015 (different scale in y axis). Error bars both sides of simulation points represent results with SSA reduced and enhanced by 20 %. ModelingsSimulations of albedo using the surface layer of the snowpack only (extended as a semi infinite snowpack) are presented with star markers. The grey shaded area specifies the melting period."

p.13, line30: "On June 6,8 and 15 we observed a decrease in albedo that coincides with the melting and the humidification of the very surface between the morning and the afternoon samplings but we can not ensure the exact origin of these changes". Please refer to Figs 3 and 8. I can see the morning and afternoon measurements in Figs 3 and 8 on 6.6.2015 and 8.6.2015, but not on 15.6.2015. If you had two measurements on that day, please show it in Figs 3 and 8.

p.13, lines 29-30: "The daily melt-freeze cycling also affected the surface but as surface hoar we were not able to measure the effects on SSA." Grammatically incorrect sentence. Maybe it should be "The daily melt-freeze cycling also affected the surface, but as this cycle often caused the formation of surface hoar, which cannot be sampled for SSA measurements made using DUFISSS, we were not able to estimate the melt-freeze cycling effects on SSA."

p.14, line 6: "...the largest errors on May 26, and June 4, 13 and 15". Please mention the year 2015 (it is obvious for you, but it reduce effort and wondering to the reader). What about the large error on May 15, 2015?

p.14, lines 8-10: "On May 26, the snowpit was performed during the afternoon, shortly after the snow began to fall. It is possible that the thickness of the uppermost layer of fresh snow that has been sampled for SSA measurements was larger than the one present during the albedo measurement because of the delay separating both samplings (at least 1 hour)." I would bet that the main reason for the good agreement with the measured albedo in the morning and the large error in the afternoon is that during the morning the snow temperature was below freezing (at least according to Fig. 4) while in the afternoon snow was melting. Hence, in the afternoon the snow sampling with the cylinder sampler was very difficult, and the resulting SSA measurements were largely overestimated (the reason for this is not clear to me: I think it has to do with the mechanical change of the microstructure when collecting the snow sample).

p.14, lines 13-15: "Furthermore, a recurrent underestimation was made when a thin (< 1 cm) surface layer of fresh snow, surface hoar, or refrozen polycrystals topped a layer of wet coarser grains as currently observed during the morning measurements." I agree. I think that, in snow melting

conditions, the SSA retrieved with the snow sampling method (DUFISSS, IceCube) has often a positive bias in case of a uniformly wet layer, and a negative bias in case of a fine surface layer overlying a wet, coarser grain layer (because of the reason described in the text).

p.14, lines 27-28: "But such a protocol would not have guaranteed better results in albedo simulations if any small spatial variability in snow was present in the field of view of the cosine collector." Please replace "But" with "However," or similar. It is true that better measurement protocol does not guarantee better albedo simulations if point representativeness is low, but I think that the snowpit representativeness and the accuracy of the snowpit SSA measurements should be treated separately, both in the best possible way.

p.15, lines 5-6: "This albedo behaviour is due to the influence of the underlying darker sea ice as light penetration depth in snow increased." I would add "and snow depth decreased".

One final question: is it so that melt ponds did not form in 2015? Or simply the campaign stopped before the ponds formed? In my opinion, the differences in snowpack characteristics between the two years is very interesting, and very enlightening for modellers. Could the author include a discussion on slush layer and melt ponds (how they formed in 2016, and possibly why they did not form in 2015) in section 4.1?
